# Supplementary material
Source: PubMed Central journal article supplement (PMC2785244)
Supplement: 0910981106_0910981106SI.pdf [file 0910981106_0910981106SI.pdf]

# Supporting Information

Lindsey and Brown 10.1073/pnas.0910981106

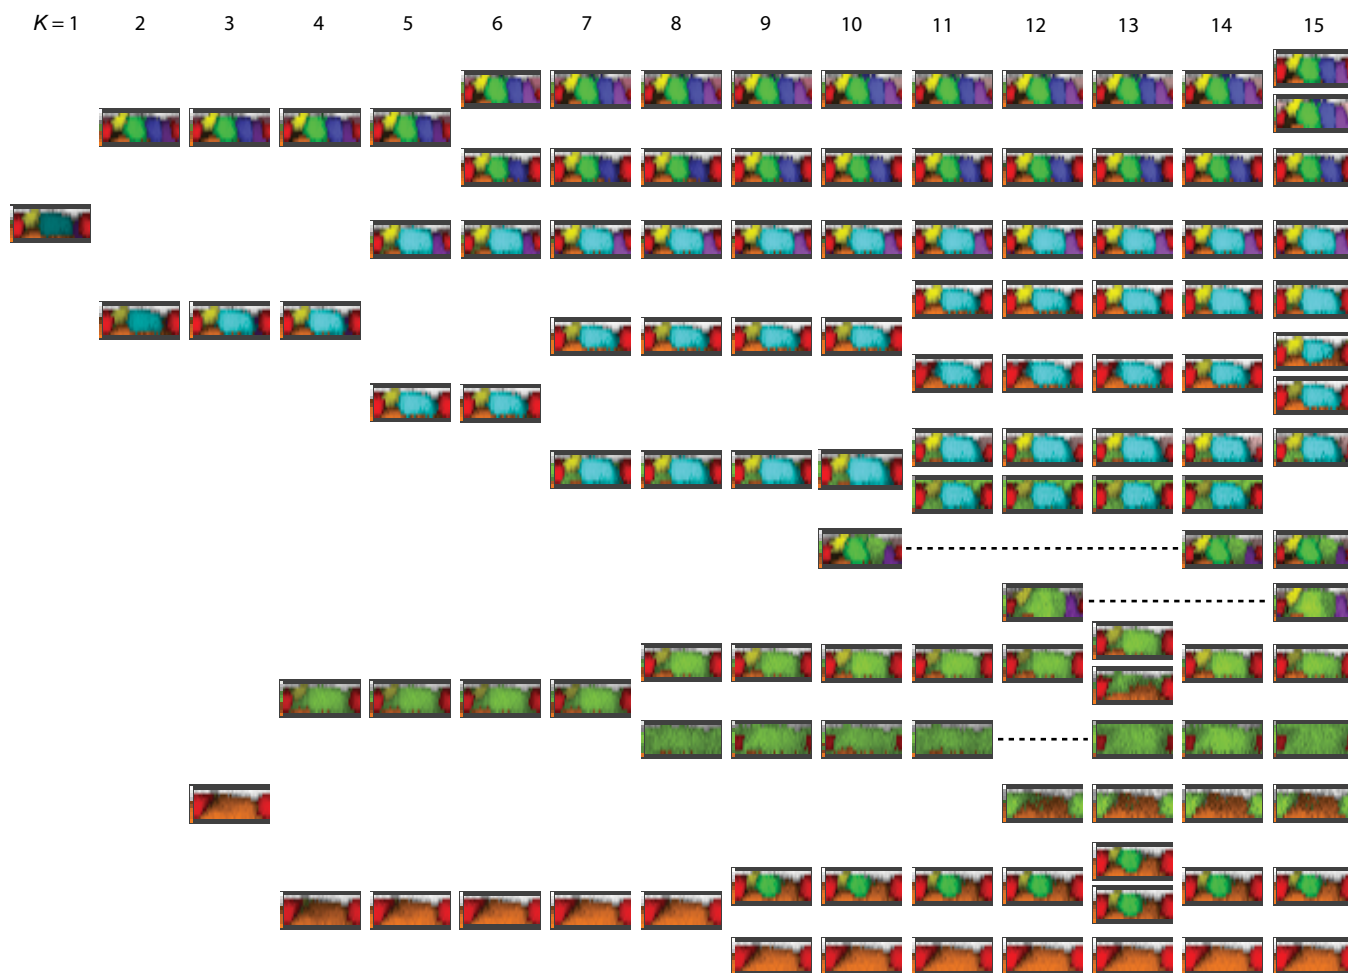

**Fig. S1** Concordance maps of the color-naming systems ("motifs"). Columns: solutions for  $K = 1 \dots 15$  clusters ( $K = 1$  is the whole dataset). The color samples are arrayed as in Fig. 1A, with false colors indicating the most prevalent color term for each chip: for clarity, orange is false color for "BLACK," and chartreuse is for "GRAY"; for composite colors, yellow is false color for "YELLOW-OR-ORANGE," and cyan is for "GRUE" ("GREEN-OR-BLUE"); for the other colors, the false color corresponds to the basic color term. The lightness of each sample is the fraction of speakers who used the most prevalent color.
